# Supplementary material
Source: PubMed Central journal article supplement (PMC2045704)
Supplement: NIHMS20643-supplement-supplement_1.pdf [file NIHMS20643-supplement-supplement_1.pdf]

## Supporting materials

### The analysis of $^{15}\text{N}$ relaxation of free L11

The dipole-dipole coupling and chemical shift anisotropy are dominant relaxation mechanisms for an amide  $^{15}\text{N}$  spin at high field. Therefore, rate constants for spin-lattice relaxation ( $R_1$ ), spin-spin relaxation ( $R_{1\rho}$ ), and dipolar cross-relaxation  $^{15}\text{N}$ - $^1\text{H}$  NOE are given by<sup>22,23,38,68</sup>:

$$R_1 = \frac{d^2}{4} [J(\omega_H - \omega_N) + 3J(\omega_N) + 6J(\omega_H + \omega_N)] + c^2 J(\omega_N) \quad (1)$$

$$R_2 = \frac{d^2}{8} (4J(0) + J(\omega_H - \omega_N) + 3J(\omega_N) + 6J(\omega_H) + 6J(\omega_H + \omega_N)) + \frac{c^2}{6} (4J(0) + 3J(\omega_N)) + R_{ex} \quad (2)$$

$$^{15}\text{N} - \{^1\text{H}\} \text{NOE} = 1 + \frac{d^2}{4R_1} \frac{\gamma_H}{\gamma_N} (6J(\omega_H + \omega_N) - J(\omega_H - \omega_N)), \quad (3)$$

in which  $d = (\mu_0 h \gamma_N \gamma_H / 8\pi^2) \langle r_{NH}^{-3} \rangle$ ,  $c = \omega_N \Delta\sigma_N / \sqrt{3}$ ,  $\mu_0$  is the permeability in vacuum;  $h$  is Planck's constant;  $\gamma_H$  and  $\gamma_N$  are the magnetic gy-ratios of  $^1\text{H}$  and  $^{15}\text{N}$ , respectively;  $r_{NH} = 1.02 \text{ \AA}$  is the nitrogen-proton bond length;  $\omega_N$  and  $\omega_H$  are the Larmor frequencies of  $^1\text{H}$  and  $^{15}\text{N}$ , respectively;  $\Delta\sigma_N = -160 \text{ ppm}$  is the chemical shift anisotropy for  $^{15}\text{N}$ ; and  $R_{ex}$  is the chemical exchange rate. Since we have used the 1 ms delay between the refocusing pulses in CPMG sequence, the significant dephasing of the signal may be possible only if the exchange rate exceeds approximately  $1000 \text{ s}^{-1}$ . Using the results from the rotational diffusion tensor calculation ( $D_r = 1.97 \cdot 10^{-7} \text{ s}^{-1}$ ,  $D_f = 1.27 \cdot 10^{-7} \text{ s}^{-1}$ , and  $\theta = 0.63^\circ$ ; Table 2), we have analyzed the data of  $^{15}\text{N}$  relaxation using the spectral density function given by:<sup>22</sup>

$$J(\omega) = \frac{2}{5} \left( \sum_{k=1}^3 A_k \left( \frac{S^2 \tau_k}{1 + (\omega \tau_k)^2} \right) + \frac{(1 - S^2) \tau}{1 + (\omega \tau)^2} \right), \quad (4)$$

where  $A_1 = (3/2 \cos^2\theta - 1/2)^2$ ;  $A_2 = 3 \sin^2\theta \cos^2\theta$ ; and  $A_3 = 3/4 \sin^4\theta$ .  $\theta$  is the angle the nitrogen-proton bond vector makes with the unique diffusion tensor axis,  $\tau_1 = (6 D_f)^{-1}$ ;  $\tau_2 = (D_i + 5 D_f)^{-1}$ ;  $\tau_3 = (4 D_i + 2 D_f)^{-1}$ ;  $1/\tau = 1/\tau_c + 1/\tau_e$   $\tau_c = (D_i + 2 D_f)/3$   $\tau_e$  is the effective correlation time of the internal motion; and  $S$  is the generalized order parameter, which contains information about the spatial extent of nitrogen-proton bond motion. Since a maximum of three free parameters (two [ $S^2$ ,  $\tau_e$ ] from equation (4) and one [ $R_{ex}$ ] from equation (2)) are required to fit experimental data, we have used the model using  $S^2$ ,  $\tau_e$  and  $R_{ex}$  to fit the experimental data.

Figure S1. The structure of L11 based on the NOE and dihedral angle constraints. The L11-NTD (a) and the L11-CTD (b) are superimposed for the best fit using residues 5–66 and 75–140, excluding the RBL, respectively.

Figure S2. Relaxation parameters for free L11. The (a)  $R_1$ , (b)  $R_2$ , and (c)  $^{15}\text{N}$ - $[^1\text{H}]$  NOE were measured at pH 6.5 and 30 °C using Bruker Avance 600. The error was estimated by duplicated the measurement separated by several days. The concentrations of  $^{15}\text{N}$ ,  $^2\text{H}$ -labeled L11 were 0.7 mM.

Figure S3. Model-free parameters for free L11. (a) Generalized order parameters ( $S^2$ ); (b) the effective internal correlation time of the internal motion ( $\tau_e$ ); and (c) the chemical exchange contributions ( $R_{ex}$ ) were determined from  $^{15}\text{N}$  relaxation measurements.

Figure S4. Comparison of the relative orientation between the L11-NTD and -CTD. (a) The solution structure of L11 is shown in ribbon drawing. (b) The L11-CTD and (c) the L11-NTD structures placed onto the rotational diffusion tensor frame were obtained by using  $R_2/R_1$  ratios in each domain separately for the calculation of the rotational diffusion tensor.

Figure S5. Comparison of the solution structure of L11 (blue) and the polypeptide chain of L11-rRNA complex in the crystal form (gold). (a) The L11-NTD and (b) the L11-CTD are superimposed for the best fit using residues 8–66 and 75–139, excluding the RBL.

a

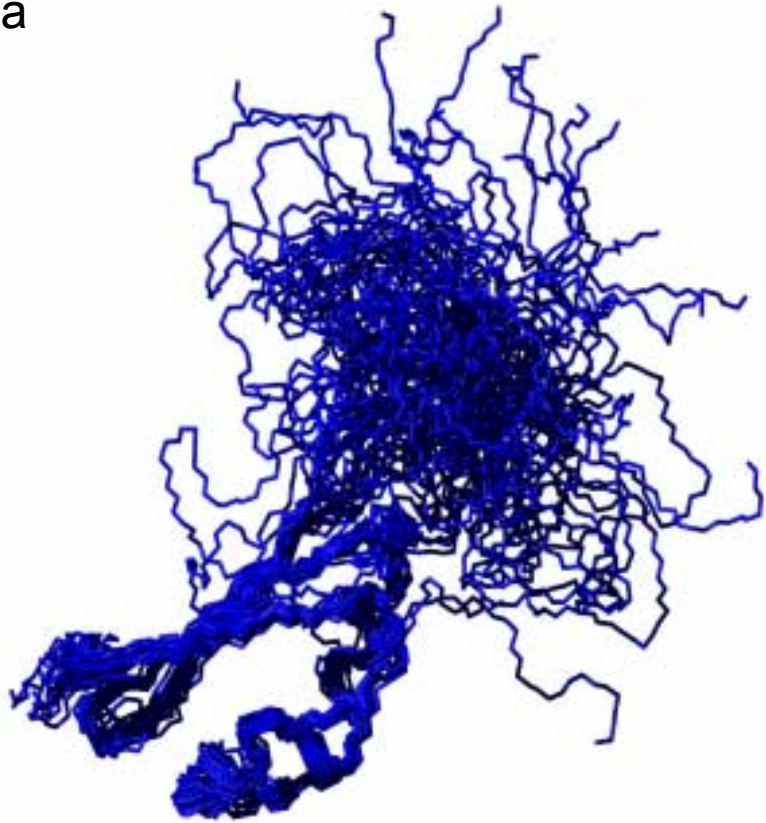

b

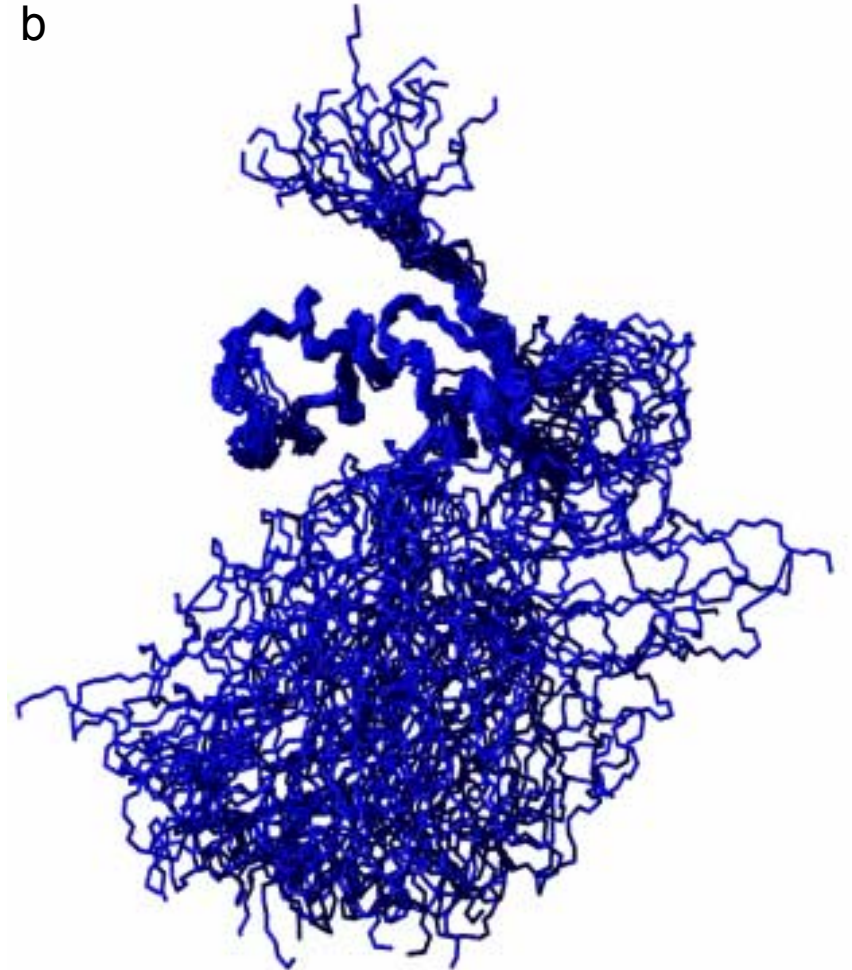

Fig. S1

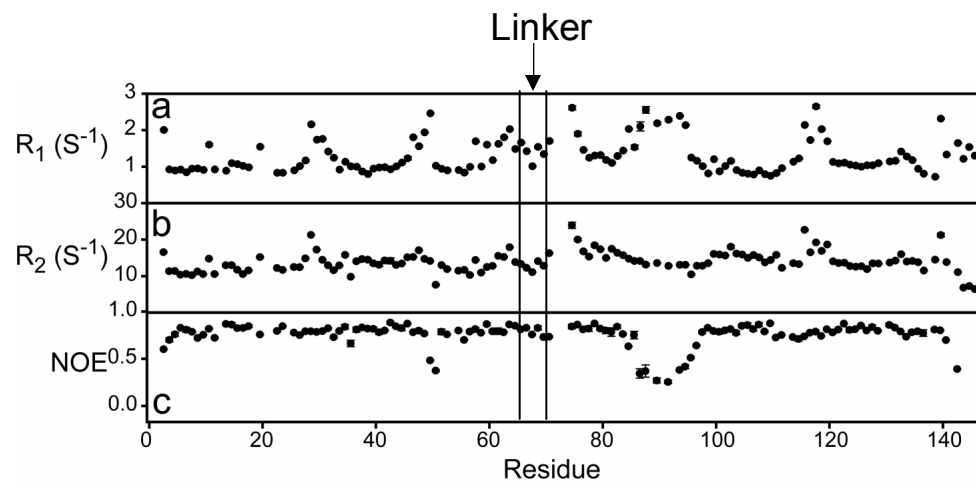

Fig. S2

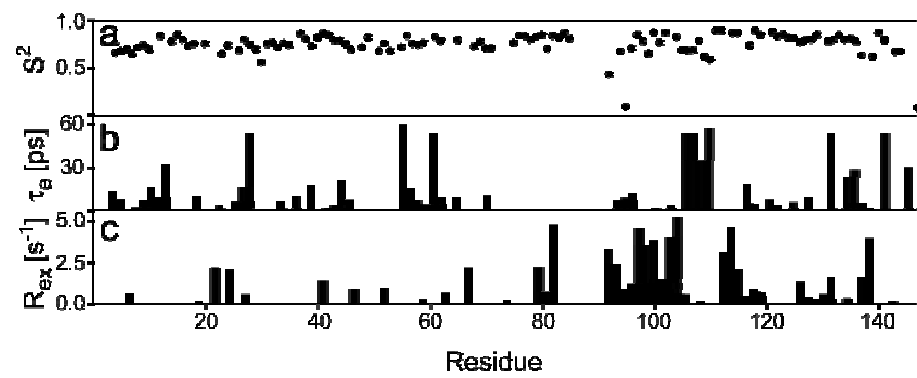

Fig. S3

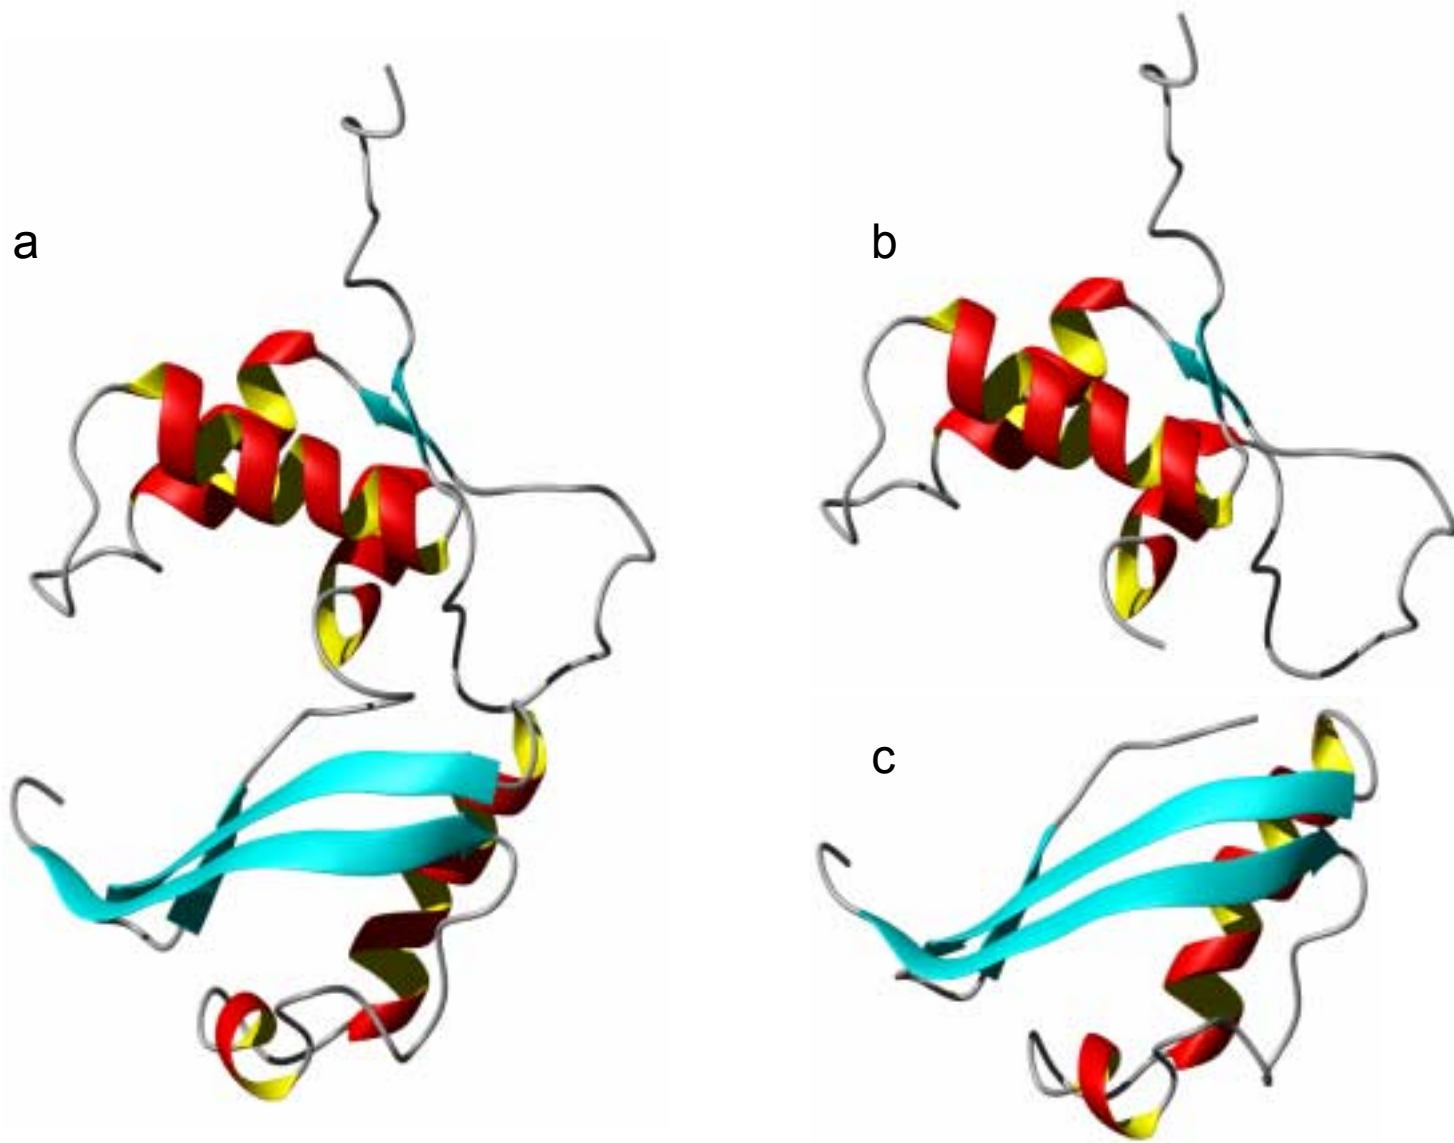

Fig. S4

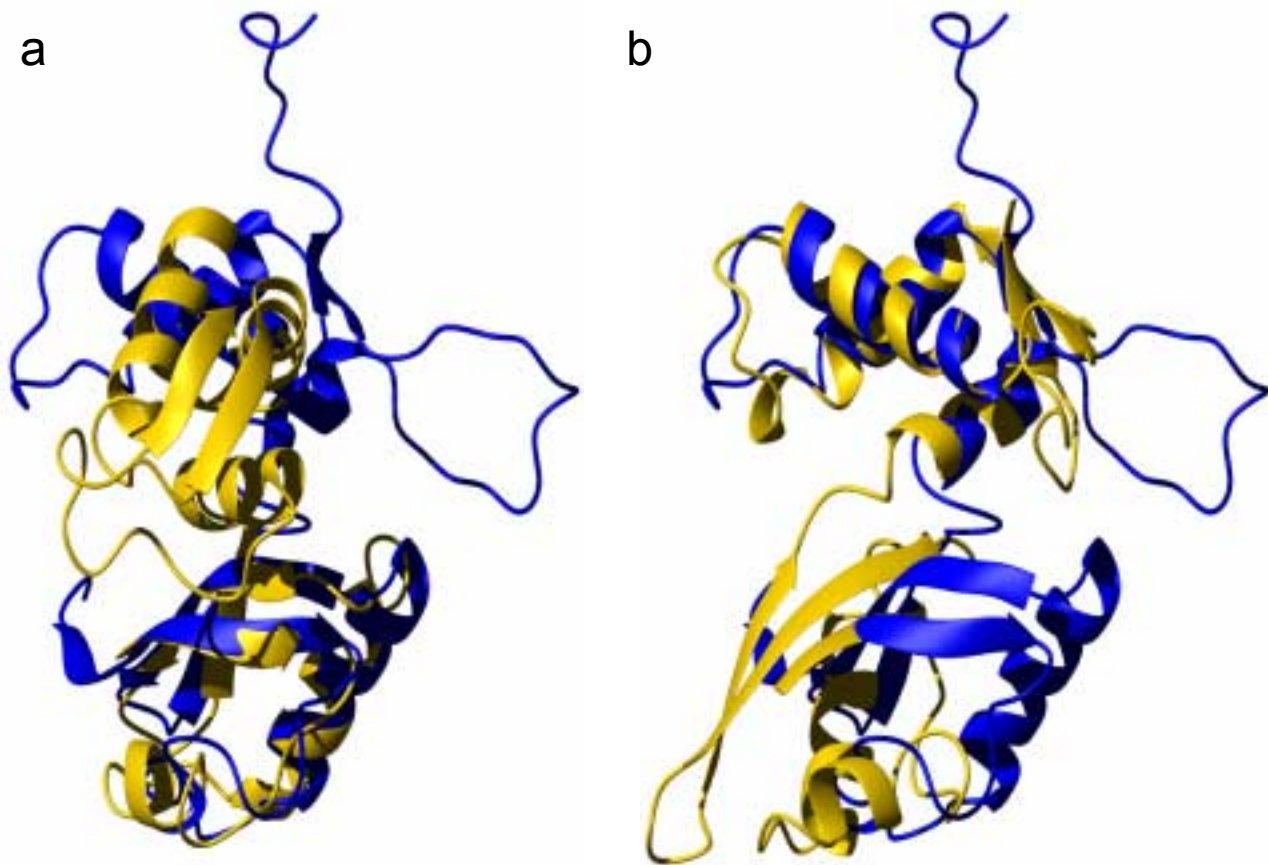

Fig. S5
